# Supplementary material for: Neoisoptera repetitively colonised Madagascar after the Middle Miocene climatic optimum
Source: bioRxiv or medRxiv preprint supplement (doi:10.1101/2021.12.01.470872), 2021-12-03
Supplement: Supplementary file [file media-6.pdf]

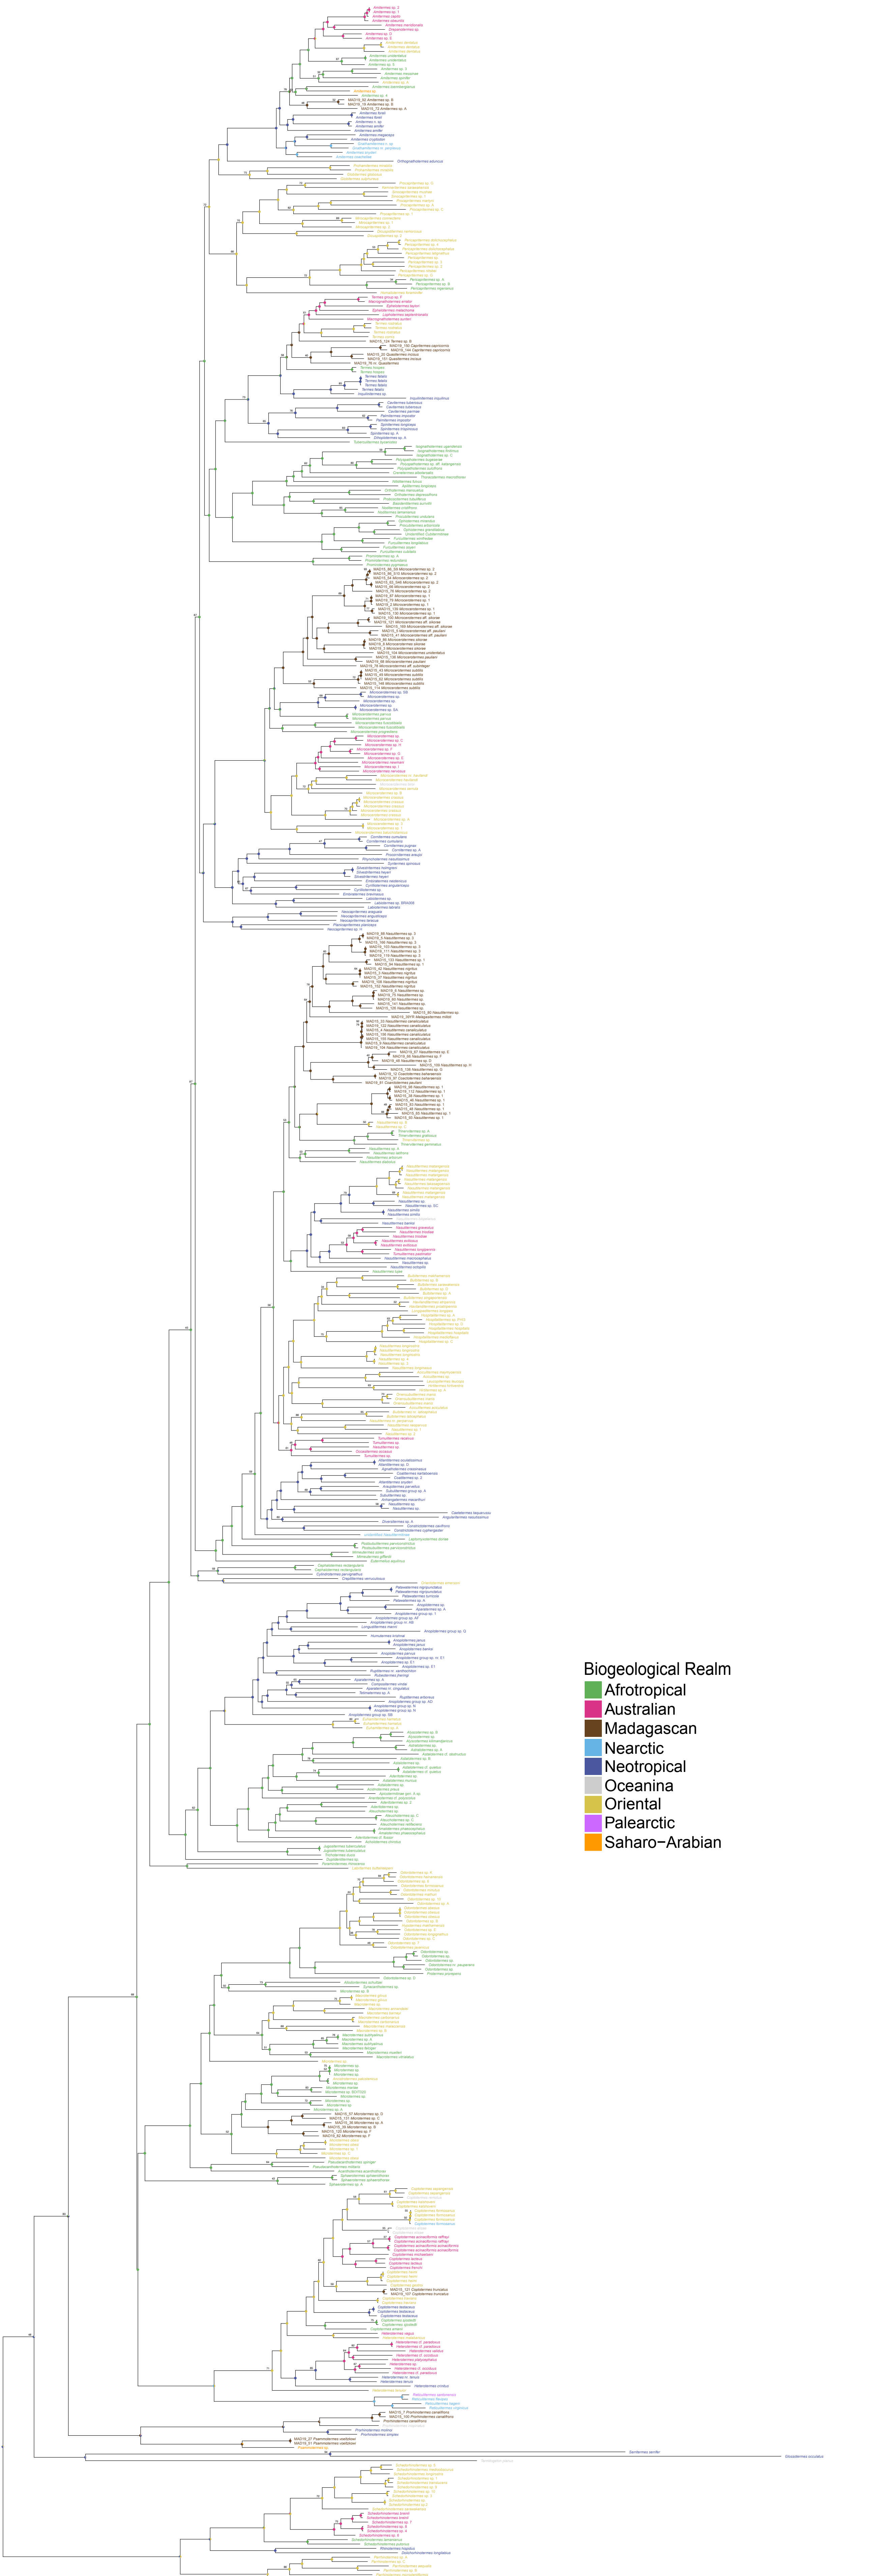

**Biogeological Realm**

- Afrotropical
- Australian
- Madagascan
- Nearctic
- Neotropical
- Oceanina
- Oriental
- Palearctic
- Saharo-Arabian

Phylogenetic tree showing relationships between various species, including *Anemone* and *Pterodroma*. The tree is rooted on the left and branches out extensively to the right. Species names are listed at the tips of the branches, often including a MADIS ID and a species name (e.g., 'MADIS\_123 Anemone sp. X'). The tree is densely populated with species, particularly in the lower and middle sections.
